# Supplementary material for: Polymorphisms in Human IL4, IL10, and TNF Genes Are Associated with an Increased Risk of Developing NSAID-Exacerbated Respiratory Disease
Source: MDPI journal article supplement (doi:10.3390/genes13040605), 2022-03-28
Supplement: s1 [file s1]

## Supplementary Materials

**Supplementary Table S1:** Allele and genotypic frequency distribution in the control population and in the NSAID hypersensitivity group.

| Gene         | Chance           | Allele frequency (C) | Allele frequency (NH) | Genotype frequency (C)           | Genotype frequency (NH)          |
|--------------|------------------|----------------------|-----------------------|----------------------------------|----------------------------------|
| <i>IL1A</i>  | -889 C>T         | C: 1.00<br>T: 0.00   | C: 0.98<br>T: 0.02    | CC: 1.00<br>CT: 0.00             | CC: 0.7<br>CT: 0.03              |
| <i>IL1B</i>  | -511 C>T         | C: 0.70<br>T: 0.30   | C: 0.69<br>T: 0.31    | CC: 0.48<br>CT: 0.44<br>TT: 0.08 | CC: 0.48<br>CT: 0.41<br>TT: 0.11 |
| <i>IL1B</i>  | 3962 C>T         | C: 0.83<br>T: 0.17   | C: 0.76<br>T: 0.24    | CC: 0.70<br>CT: 0.26<br>TT: 0.04 | CC: 0.57<br>CT: 0.40<br>TT: 0.03 |
| <i>IL1R1</i> | <i>pst1</i> C>T  | C: 0.67<br>T: 0.33   | C: 0.73<br>T: 0.27    | CC: 0.45<br>CT: 0.44<br>TT: 0.11 | CC: 0.54<br>CT: 0.39<br>TT: 0.07 |
| <i>IL1RN</i> | <i>mspa1</i> T>C | C: 0.24<br>T: 0.76   | C: 0.32<br>T: 0.68    | CC: 0.05<br>CT: 0.38<br>TT: 0.57 | CC: 0.07<br>CT: 0.50<br>TT: 0.43 |
| <i>IL2</i>   | -330 T>G         | G: 0.32<br>T: 0.68   | G: 0.33<br>T: 0.67    | GG: 0.10<br>GT: 0.43<br>TT: 0.47 | GG: 0.15<br>GT: 0.36<br>TT: 0.49 |
| <i>IL2</i>   | 166 G>T          | G: 0.72<br>T: 0.28   | G: 0.64<br>T: 0.26    | GG: 0.51<br>GT: 0.41<br>TT: 0.08 | GG: 0.44<br>GT: 0.40<br>TT: 0.16 |
| <i>IL4</i>   | -1098 T>G        | G: 0.07<br>T: 0.93   | G: 0.14<br>T: 0.86    | GG: 0.03<br>GT: 0.08<br>TT: 0.89 | GG: 0.00<br>GT: 0.27<br>TT: 0.73 |
| <i>IL4</i>   | -589 C>T         | C: 0.86<br>T: 0.14   | C: 0.74<br>T: 0.26    | CC: 0.75<br>CT: 0.21<br>TT: 0.04 | CC: 0.51<br>CT: 0.47<br>TT: 0.02 |
| <i>IL4</i>   | -33 C>T          | C: 0.86<br>T: 0.14   | C: 0.82<br>T: 0.18    | CC: 0.75<br>CT: 0.22<br>TT: 0.03 | CC: 0.67<br>CT: 0.29<br>TT: 0.04 |
| <i>IL4R</i>  | 1092 A>G         | A: 0.77<br>G: 0.23   | A: 0.81<br>G: 0.19    | AA: 0.60<br>AG: 0.33<br>GG: 0.07 | AA: 0.64<br>AG: 0.34<br>GG: 0.02 |
| <i>IL6</i>   | -174 G>C         | C: 0.38<br>G: 0.62   | C: 0.30<br>G: 0.70    | CC: 0.15<br>CG: 0.46<br>GG: 0.39 | CC: 0.06<br>CG: 0.48<br>GG: 0.46 |
| <i>IL6</i>   | nt565 G>A        | A: 0.37<br>G: 0.63   | A: 0.27<br>G: 0.73    | AA: 0.14<br>AG: 0.46<br>GG: 0.40 | AA: 0.04<br>AG: 0.47<br>GG: 0.49 |
| <i>IL10</i>  | -592 C>A         | A: 0.31<br>C: 0.69   | A: 0.30<br>C: 0.70    | AA: 0.12<br>AC: 0.38<br>CC: 0.50 | AA: 0.02<br>AC: 0.55<br>CC: 0.43 |
| <i>IL10</i>  | -819 C>T         | C: 0.67<br>T: 0.33   | C: 0.69<br>T: 0.31    | CC: 0.49<br>CT: 0.36             | CC: 0.43<br>CT: 0.53             |

|                     |           |                    |                    |                                  |                                  |
|---------------------|-----------|--------------------|--------------------|----------------------------------|----------------------------------|
|                     |           |                    |                    | TT: 0.15                         | TT: 0.04                         |
| <b><i>IL10</i></b>  | -1082 A>G | A: 0.67<br>G: 0.33 | A: 0.67<br>G: 0.33 | AA: 0.46<br>AG: 0.43<br>GG: 0.11 | AA: 0.36<br>AG: 0.60<br>GG: 0.04 |
| <b><i>IL12B</i></b> | -1188 A>C | A: 0.83<br>C: 0.17 | A: 0.73<br>C: 0.27 | AA: 0.71<br>AC: 0.25<br>CC: 0.04 | AA: 0.54<br>AC: 0.38<br>CC: 0.08 |
| <b><i>IFN</i></b>   | 874 A>T   | A: 0.65<br>T: 0.35 | A: 0.54<br>T: 0.46 | AA: 0.51<br>AT: 0.27<br>TT: 0.22 | AA: 0.32<br>AT: 0.45<br>TT: 0.23 |
| <b><i>TGFB1</i></b> | c10 T>C   | C: 0.41<br>T: 0.59 | C: 0.49<br>T: 0.51 | CC: 0.18<br>CT: 0.47<br>TT: 0.35 | CC: 0.22<br>CT: 0.54<br>TT: 0.24 |
| <b><i>TGFB1</i></b> | c25 G>C   | A: 0.25<br>G: 0.75 | C: 0.06<br>G: 0.94 | CC: 0.04<br>CG: 0.16<br>GG: 0.80 | CC: 0.01<br>CG: 0.09<br>GG: 0.90 |
| <b><i>TNF</i></b>   | -238 G>A  | A: 0.07<br>G: 0.93 | A: 0.08<br>G: 0.92 | AA: 0.01<br>AG: 0.14<br>GG: 0.85 | AA: 0.01<br>AG: 0.14<br>GG: 0.85 |
| <b><i>TNF</i></b>   | -308 G>A  | A: 0.06<br>G: 0.94 | A: 0.25<br>G: 0.75 | AA: 0.01<br>AG: 0.10<br>GG: 0.89 | AA: 0.06<br>AG: 0.38<br>GG: 0.56 |

C: controls; NH: NSAID hypersensitivity

**Supplementary Table S2:** Statistical analysis of the allelic and genotypic distributions of all the SNPs included in the study in NSAID hypersensitivity patients compared with controls.

| SNP       | # p-value<br>(Allelic) | # p-value<br>(Genotypic) | SNP       | # p-value<br>(Allelic) | # p-value<br>(Genotypic) |
|-----------|------------------------|--------------------------|-----------|------------------------|--------------------------|
| rs2234650 | 0.17                   | 0.40                     | rs1800471 | <b>0.043*</b>          | 0.19                     |
| rs1143634 | 0.09                   | 0.11                     | rs2243248 | <b>0.023*</b>          | <b>&lt;0.001*</b>        |
| rs16944   | 0.74                   | 0.76                     | rs2243250 | <b>0.002*</b>          | <b>&lt;0.001*</b>        |
| rs1800587 | 0.34                   | 0.34                     | rs2070874 | 0.26                   | 0.41                     |
| rs2430561 | 0.12                   | 0.09                     | rs2069762 | 0.84                   | 0.48                     |
| rs3212227 | <b>0.013*</b>          | <b>0.047*</b>            | rs2069763 | 0.10                   | 0.14                     |
| rs1801275 | 0.34                   | 0.37                     | rs1800795 | 0.08                   | 0.13                     |
| rs315952  | 0.06                   | 0.11                     | rs1800797 | <b>0.041*</b>          | <b>0.040*</b>            |
| rs1800629 | <b>&lt;0.001*</b>      | <b>&lt;0.001*</b>        | rs1800896 | 0.88                   | <b>0.026*</b>            |
| rs361525  | 0.78                   | 0.91                     | rs1800871 | 0.59                   | <b>0.006*</b>            |
| rs1982073 | 0.09                   | 0.18                     | rs1800872 | 0.79                   | <b>0.008*</b>            |

# Fisher's p-value for comparing the group of NSAID hypersensitivity patients with the control group. \***p-value < 0.05**

**A.**

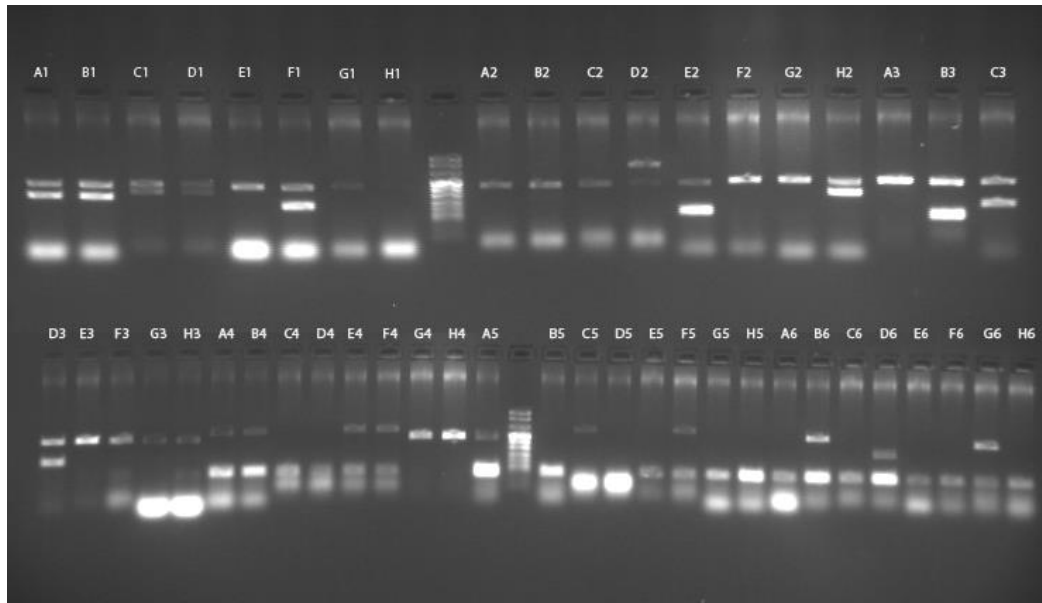

**B.**

|          | 1                       | 2                        | 3                             | 4                             | 5                             | 6                              |
|----------|-------------------------|--------------------------|-------------------------------|-------------------------------|-------------------------------|--------------------------------|
| <b>A</b> | IL-1R<br>T/1970<br>288  | g-IFN<br>T/874<br>277    | TNFa<br>A/-308//G/-238<br>110 | IL4<br>T/-1098//C/-590<br>557 | IL6<br>C/-174//G565<br>426    | IL10<br>A/-1082//A/-592<br>530 |
| <b>B</b> | IL-1R<br>C/1970<br>288  | g-IFN<br>A/874<br>277    | TNFa<br>G/-308//G/-238<br>110 | IL4<br>T/-1098//T/-590<br>557 | IL6<br>G/-174//G565<br>427    | IL10<br>A/-1082//C/-592<br>530 |
| <b>C</b> | IL-1b<br>C/+3962<br>336 | IL-12<br>A/-1188<br>802  | TGFb1<br>T/10<br>195          | IL2<br>T/-330//T/166<br>569   | IL4<br>C/-590//C/-33<br>610   | IL10<br>A/-1082//T/-819<br>305 |
| <b>D</b> | IL-1b<br>T/+3962<br>336 | IL-12<br>C/-1188<br>802  | TGFb1<br>C/10<br>195          | IL2<br>G/-330//T/166<br>569   | IL4<br>C/-590//T/-33<br>610   | IL10<br>A/-1082//C/-819<br>305 |
| <b>E</b> | IL-1b<br>T/-511<br>215  | IL-4Ra<br>A/1902<br>143  | TGFb1<br>T/10-C/25<br>80      | IL2<br>G/-330//G/166<br>564   | IL4<br>T/-590//C/-33<br>610   | IL10<br>G/-1082//C/-592<br>530 |
| <b>F</b> | IL-1b<br>C/-511<br>215  | IL-4Ra<br>G/1902<br>143  | TGFb1<br>T/10-G/25<br>80      | IL2<br>T/-330//G/166<br>562   | IL4<br>T/-590//T/-33<br>610   | IL10<br>G/-1082//C/-819<br>305 |
| <b>G</b> | IL-1a<br>C/-889<br>220  | IL-1RA<br>C/11100<br>297 | TGFb1<br>C/10-C/25<br>80      | TNFa<br>A/-308//A/-238<br>110 | IL4<br>G/-1098//C/-590<br>557 | IL6<br>C/-174//A/565<br>428    |
| <b>H</b> | IL-1a<br>T/-889<br>220  | IL-1RA<br>T/11100<br>297 | TGFb1<br>C/10-G/25<br>80      | TNFa<br>G/-308//A/-238<br>110 | IL4<br>G/-1098//T/-590<br>557 | IL6<br>G/-174//A565<br>428     |
|          |                         | Control 440pb            |                               |                               |                               |                                |
|          |                         | Control 89               |                               |                               |                               |                                |

**Supplementary Figure S1. Results of PCR-SSP genotyping analysis.** **A:** Visualization with UV light of the 22 polymorphisms through bands in an electrophoresis gel corresponding to a patient. **B:** Results interpretation template. Each box corresponds to each of the wells of image A. In each box the amplifying allele is indicated, as well as the size in base pairs of the product band. In the gray shaded boxes the size of the control band is 440 bp, and in the white boxes the control band is 89 bp.
